# Supplementary material
Source: PubMed Central journal article supplement (PMC3397908)
Supplement: supp_M112.367268_jbc.M112.367268-1.pdf [file supp_M112.367268_jbc.M112.367268-1.pdf]

## SUPPLEMENTAL FIGURE LEGENDS

**Supplemental Figure 1.** Modulation of Hsp90 levels does not significantly affect endogenous TDP-43 levels. (A) Western blot of HeLa cell lysates transfected with control [Ctrl] or Hsp90 siRNA for 72 hours. (B) Western blot of HeLa cell lysates transfected with Vector [Vec] or Hsp90 plasmid DNA for 48 hours. (C) Densitometric quantitation of full length (FL) [dark gray bars] and cleaved (C) [light gray bars] TDP-43 levels after respective siRNA or DNA transfection is shown relative to GAPDH  $\pm$  SD. \*\* indicates  $p < 0.01$  by Student t-test.

**Supplemental Figure 2.** FL TDP-43 associates with Cdc37 more in normal brain compared to AD brain. Human age matched normal and Alzheimer's disease [AD] patient samples were subjected to co-immunoprecipitation with Cdc37 antibody. Western blot analysis shows that FL TDP-43 associates with Cdc37 more in normal brain compared to AD brain. Increased interaction of Cdc37 with phospho-tau [pTau; detected with pS199/S202 Ab] coincides with a decreased interaction of Cdc37 with TDP-43 in AD brain and increased TDP-43 cleavage in the lysates [inputs].

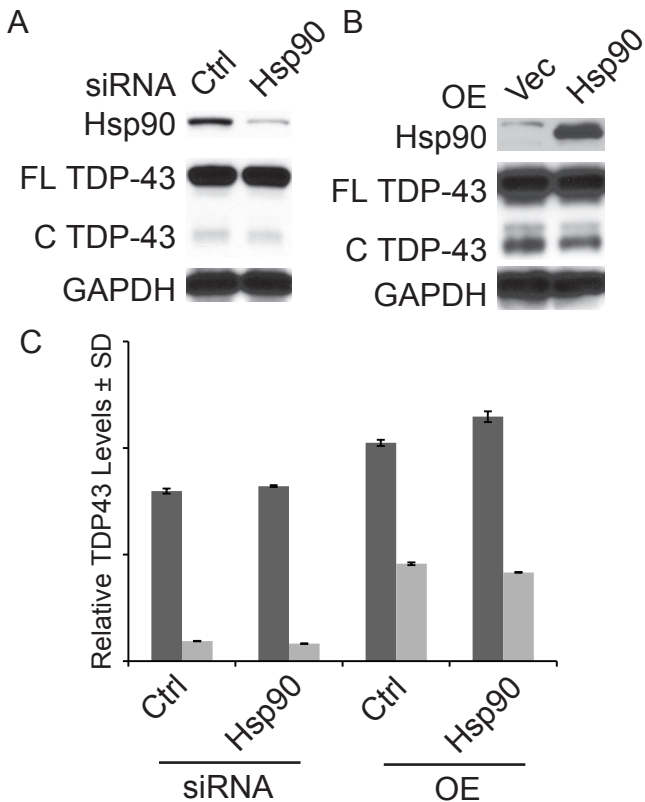

Supplemental Fig 1

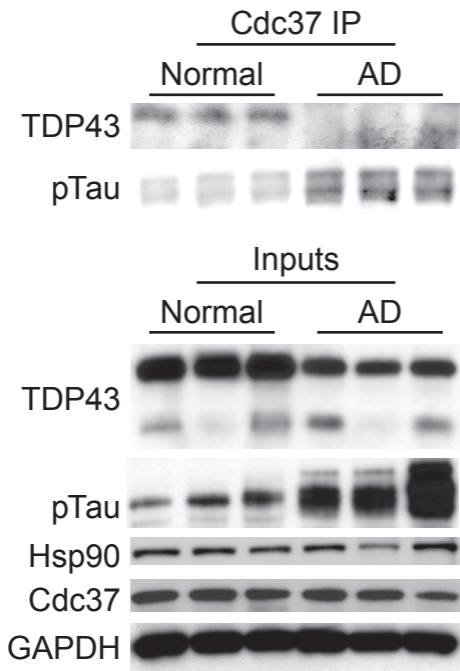

Supplemental Fig 2
